# Supplementary material for: Tissue-Resident-Memory CD8+ T Cells Bridge Innate Immune Responses in Neighboring Epithelial Cells to Control Human Genital Herpes
Source: PubMed Central journal article supplement (PMC8450389; doi:10.3389/fimmu.2021.735643), 2021-09-06
Supplement: DataSheet_1.pdf [file DataSheet_1.pdf]

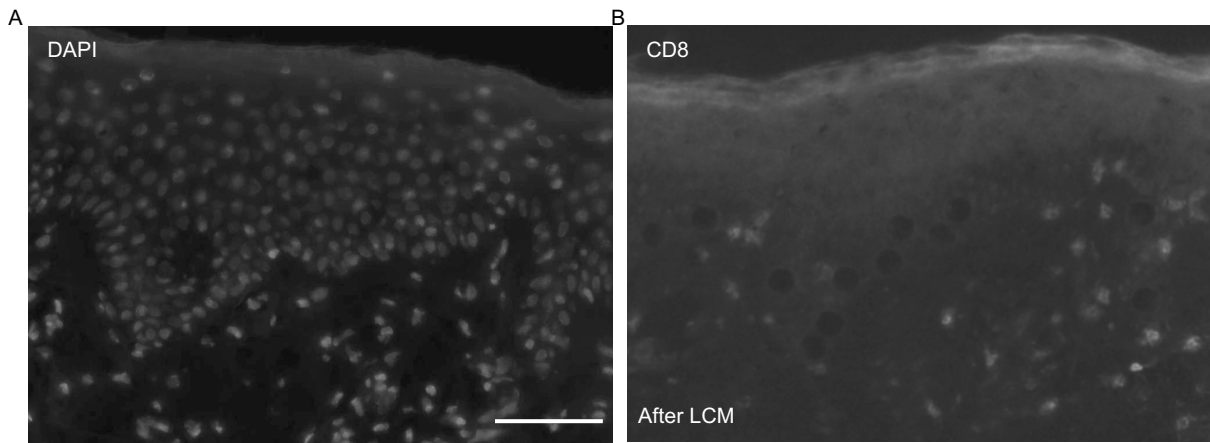

**Supplementary Figure 1. Isolation of basal keratinocytes in skin biopsies at the single cell level by laser capture microdissection.**

(A) DAPI nucleus staining depicting the structure of epidermal and dermal layers. Scale bar, 50  $\mu\text{m}$ . (B) Captured keratinocytes are free from nearby CD8<sup>+</sup> T cells.

A

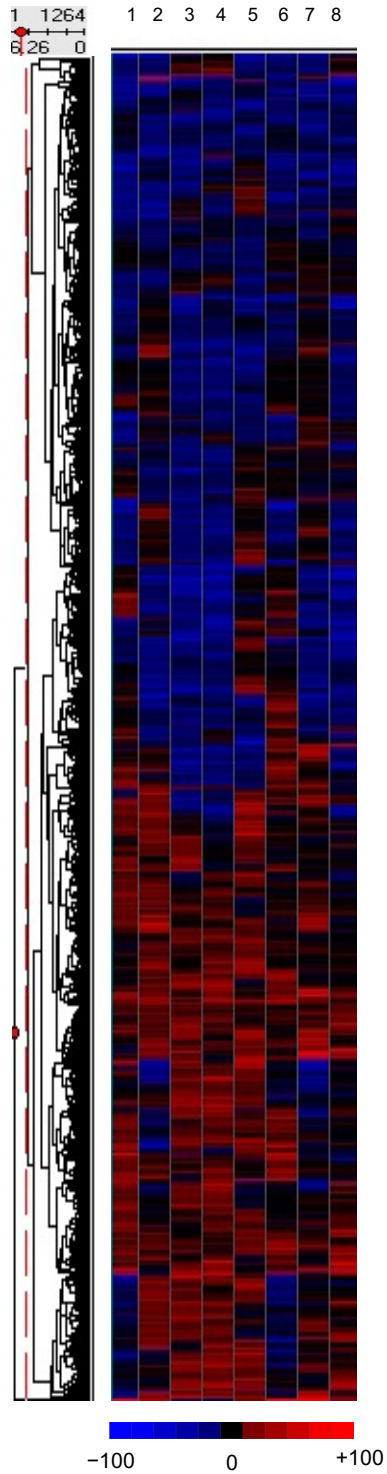

B

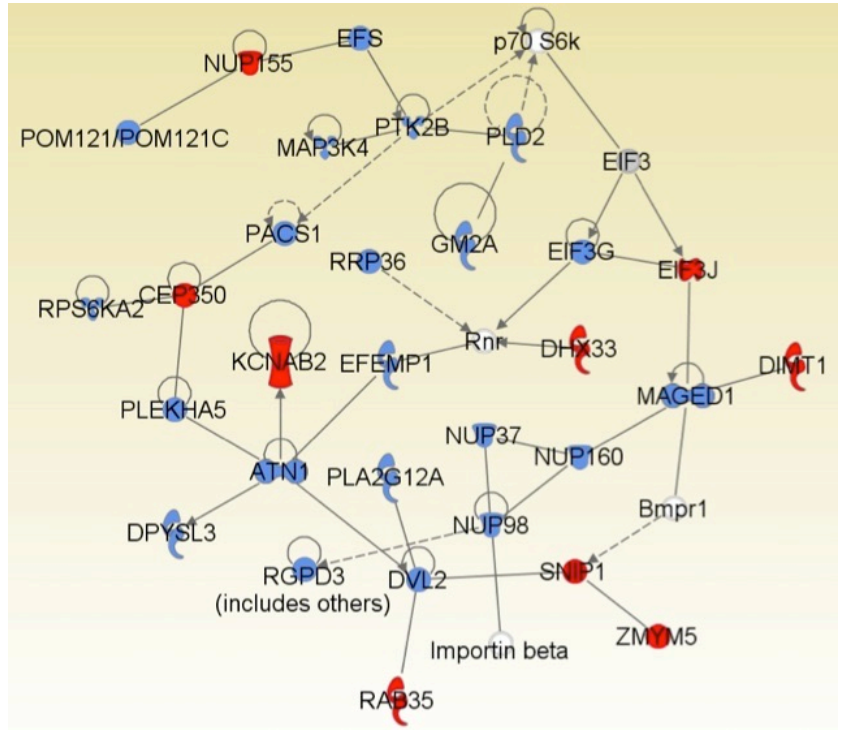

C

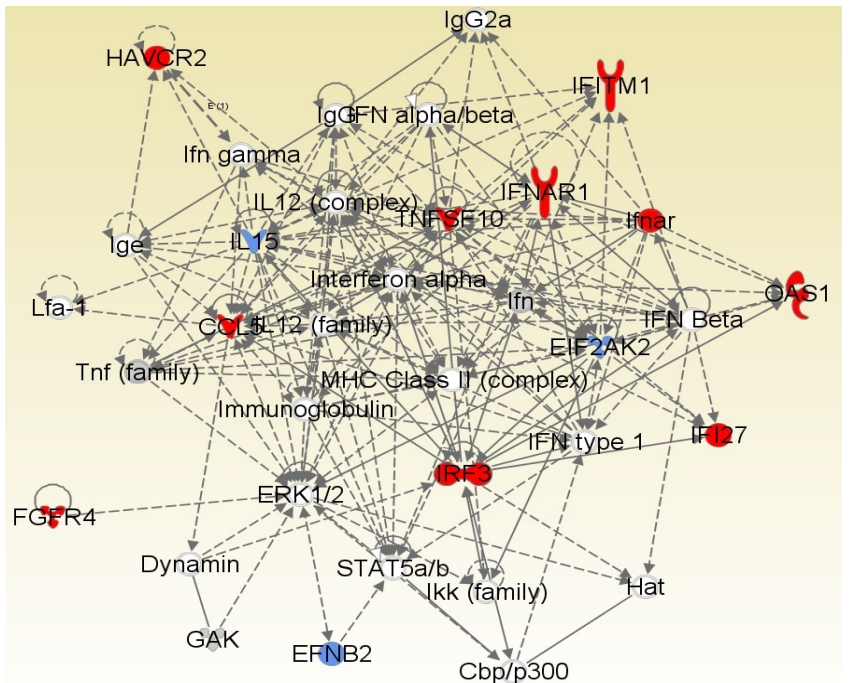

**Supplementary Figure 2. Keratinocytes surrounding the DEJ CD8 T cells down-regulate genes in host transcription, but up-regulate expression of interferon stimulated genes.**

(A) Hierarchical clustering of differentially expressed genes (1264 genes) through whole genome transcriptional profiling of individually laser microdissected keratinocytes neighboring DEJ CD8<sup>+</sup> T cells from n = 5 post-healing skin biopsies (1, 2, 3, 4, 5) and from n = 3 lesion biopsies (6, 7, 8) in comparison to their matched normal arm controls. On average, about 100 keratinocytes were captured from each biopsy. (B) Pathway analysis showing a group of down regulation of genes involved in host transcriptional machinery. (C) Pathway analysis identifying up-regulation of genes shared by type I and type II interferon signaling pathways. The key to different symbol shapes in B&C can be found in [https://qiagen.secure.force.com/KnowledgeBase/articles/Basic\\_Technical\\_Q\\_A/Legend](https://qiagen.secure.force.com/KnowledgeBase/articles/Basic_Technical_Q_A/Legend)

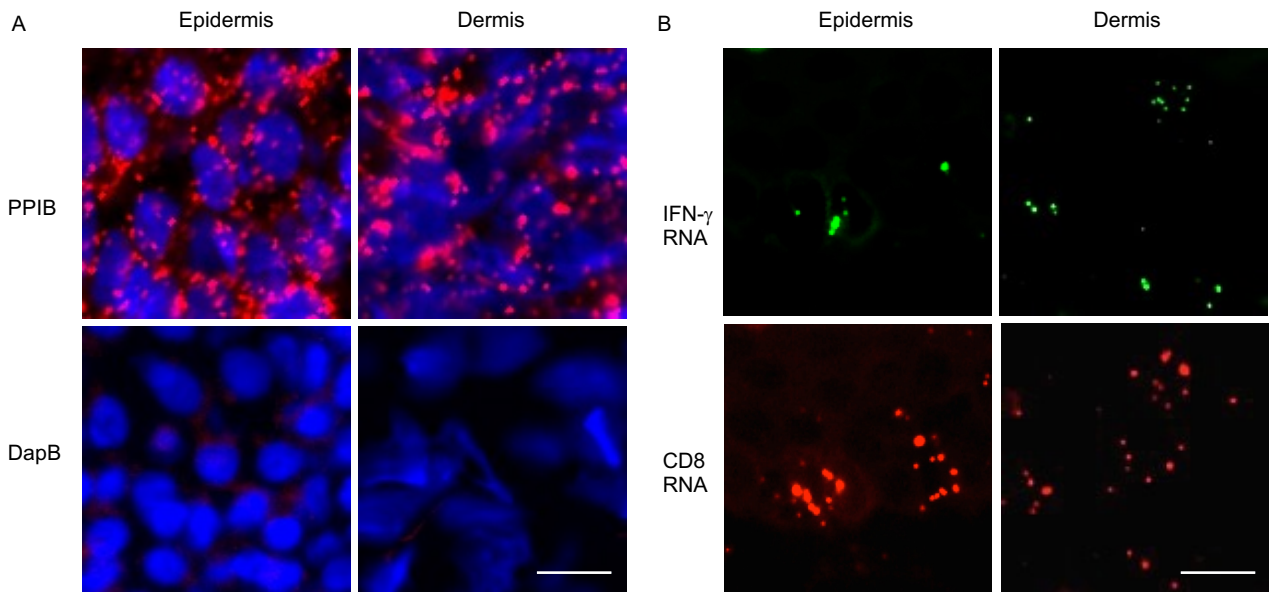

**Supplementary Figure 3. Fluorescence in situ hybridization (FISH) to detect mRNA transcripts in human skin.**

(A) Representative micrographs depicting positive (PPIB) and negative (DapB) probe signals in the epidermal and dermal layer of an 8-week post-healing skin biopsy. Scale bars, 20  $\mu\text{m}$ . (B) Separation of individual signals of *IFNG* and *CD8* mRNA transcript expression in the dual FISH staining shown in Fig. 3C.

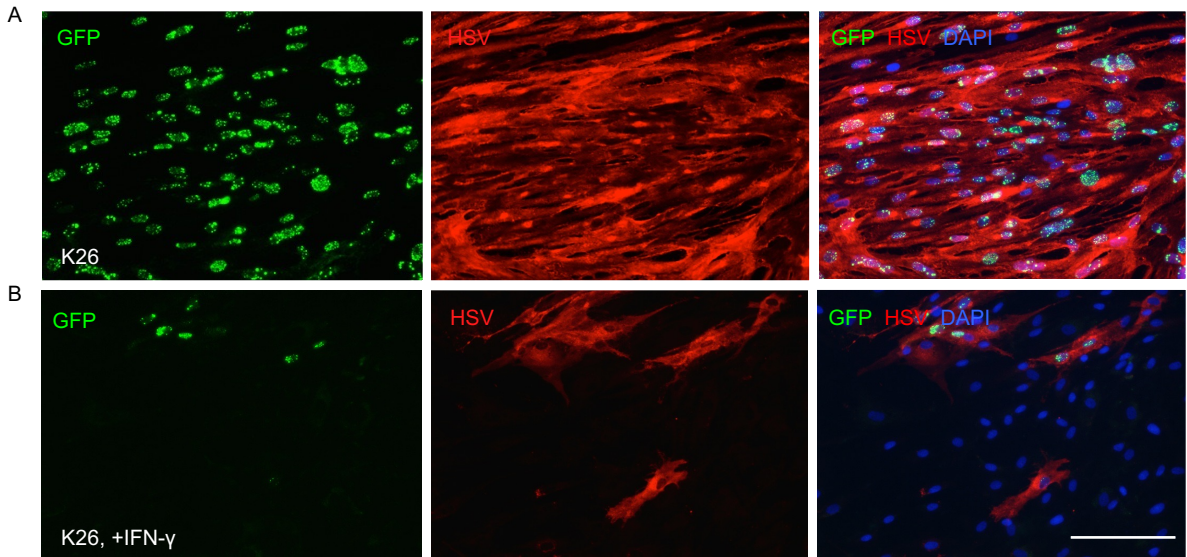

**Supplementary Figure 4. IFN- $\gamma$  inhibition of HSV gene expression in primary human fibroblasts.**

GFP and HSV viral antigen expression in K26 infected MOI = 1, 16 h.p.i. human dermal fibroblasts mock-treated (A) or pretreated with IFN- $\gamma$  100 U/ml for 48 hours (B). A rabbit polyclonal antibody used to detect all HSV protein expression. Scale bar, 100  $\mu$ m.

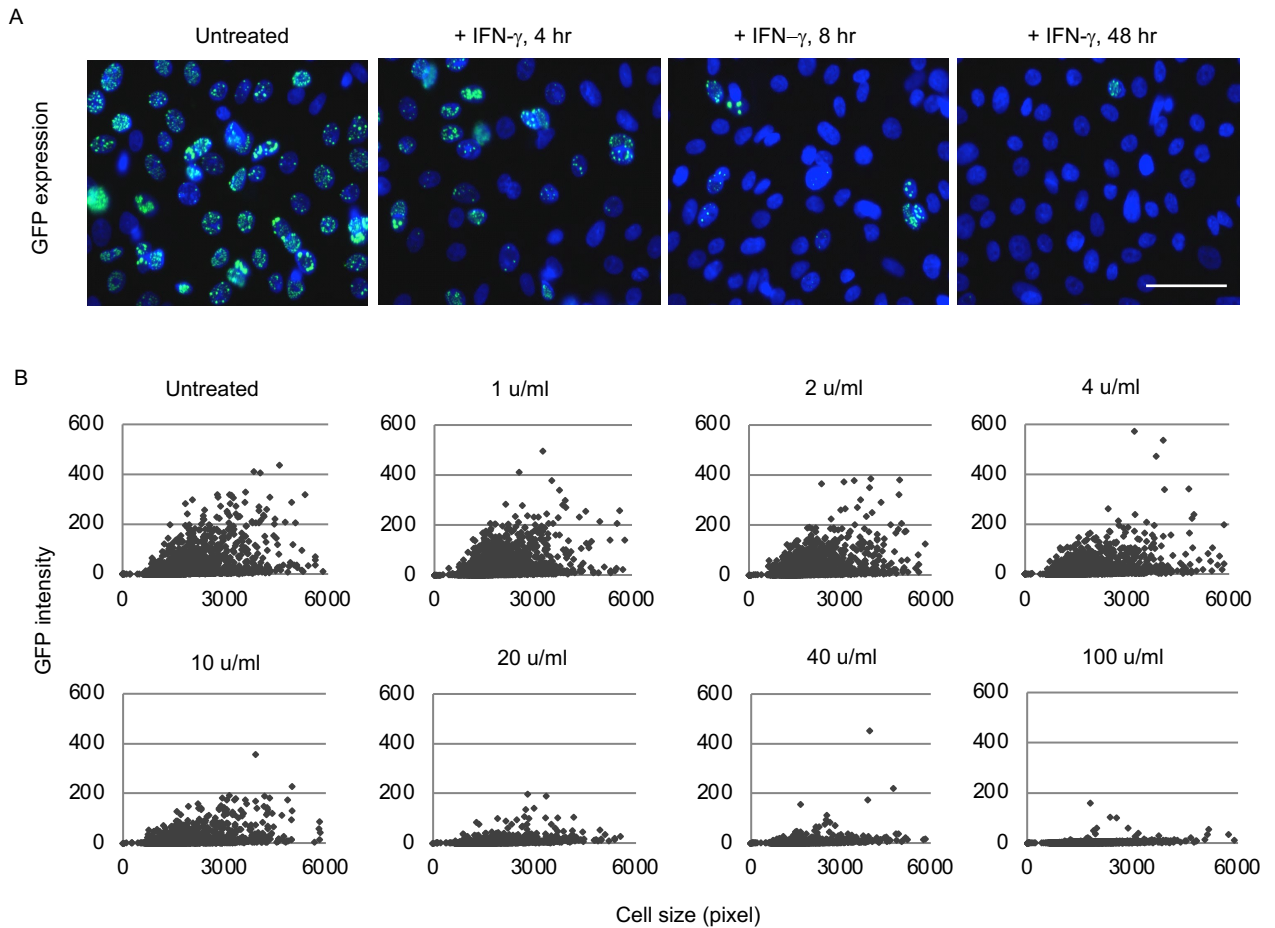

**Supplementary Figure 5. Time- and dose-dependent inhibitory effect of IFN- $\gamma$  on HSV infection.**

(A) Representative raw images depicting GFP expression in K26 infected cells pretreated with IFN- $\gamma$  under different times. Primary human keratinocytes, either mock-treated or pretreated with IFN- $\gamma$  100 U/ml for the duration of 4, 8 and 48 hours. Scale bar, 50  $\mu$ m. MOI=1, 16 h.p.i. (B) Dot plot showing GFP expression in K26 infected human keratinocytes either mock-treated or pretreated with IFN-g at 1, 2, 4, 10, 20, 40, or 100 U/ml concentration for 48 hours. MOI=1, 16 h.p.i.

**Supplementary Table 1:** Significantly enriched GO terms of IFN- $\gamma$  regulated genes in primary human keratinocytes

| GO terms                                                                          | FDR   | Gene up regulated | Gene down regulated |
|-----------------------------------------------------------------------------------|-------|-------------------|---------------------|
| Antigen processing and presentation of exogenous peptide antigen via MHC class II | 0.008 | 4                 | 0                   |
| Regulation of cell motility                                                       | 0.010 | 14                | 18                  |
| Antimicrobial humoral response                                                    | 0.011 | 3                 | 0                   |
| Lipid transport                                                                   | 0.018 | 13                | 11                  |
| Negative regulation of transcription regulator activity                           | 0.025 | 6                 | 6                   |
| Antigen processing and presentation of endogenous peptide antigen via MHC class I | 0.043 | 4                 | 0                   |
| Inflammatory response                                                             | 0.050 | 41                | 14                  |
| Innate immune response                                                            | 0.050 | 41                | 5                   |
| Response to virus                                                                 | 0.050 | 35                | 4                   |

**Supplementary Table 2.** T-test for whether individual IMCIA gene expression level higher at week 2 versus control

| Signature genes | Difference, experimental minus control | Unadjusted p-value | Benjamini-Hochberg adjusted p-value | Li & Ji adjusted p-value |
|-----------------|----------------------------------------|--------------------|-------------------------------------|--------------------------|
| APOBEC3G        | 0.020                                  | 0.895              | 0.895                               | 0.895                    |
| FOSL1           | -0.047                                 | 0.864              | 0.889                               | 0.888                    |
| PLSCR1          | 0.113                                  | 0.648              | 0.687                               | 0.685                    |
| CCL8            | 0.154                                  | 0.611              | 0.669                               | 0.666                    |
| MYD88           | -0.117                                 | 0.604              | 0.669                               | 0.666                    |
| DDX58           | 0.064                                  | 0.600              | 0.669                               | 0.666                    |
| ISG15           | 0.198                                  | 0.410              | 0.495                               | 0.491                    |
| UNC93B1         | 0.214                                  | 0.305              | 0.381                               | 0.378                    |
| HERC5           | 0.083                                  | 0.212              | 0.275                               | 0.272                    |
| ISG20           | 0.177                                  | 0.154              | 0.207                               | 0.204                    |
| STAT2           | 0.080                                  | 0.129              | 0.181                               | 0.178                    |
| IRF9            | 0.114                                  | 0.125              | 0.181                               | 0.178                    |
| CXCL10          | 0.854                                  | 0.095              | 0.145                               | 0.142                    |
| IFITM1          | 0.177                                  | 0.085              | 0.135                               | 0.132                    |
| RSAD2           | 0.494                                  | 0.083              | 0.135                               | 0.132                    |
| MX1             | 0.117                                  | 0.078              | 0.135                               | 0.132                    |
| MICB            | 0.153                                  | 0.078              | 0.135                               | 0.132                    |
| ZC3HAV1         | 0.114                                  | 0.071              | 0.135                               | 0.132                    |
| IL15            | 0.705                                  | 0.046              | 0.094                               | 0.090                    |
| EIF2AK2         | 0.192                                  | 0.043              | 0.093                               | 0.089                    |
| IFI16           | 0.113                                  | 0.042              | 0.093                               | 0.089                    |
| IFIH1           | 0.874                                  | 0.041              | 0.093                               | 0.089                    |
| BCL3            | 0.522                                  | 0.026              | 0.070                               | 0.066                    |
| BST2            | 0.230                                  | 0.025              | 0.070                               | 0.066                    |
| MX2             | 0.682                                  | 0.021              | 0.067                               | 0.061                    |
| CCL5            | 0.252                                  | 0.019              | 0.066                               | 0.060                    |
| TRIM22          | 0.225                                  | 0.017              | 0.066                               | 0.060                    |
| IFI44           | 0.279                                  | 0.012              | 0.052                               | 0.046                    |
| IFI35           | 0.176                                  | 0.008              | 0.038                               | 0.032                    |
| IRF7            | 0.274                                  | 0.007              | 0.038                               | 0.032                    |
| B2M             | 0.124                                  | 0.006              | 0.038                               | 0.032                    |
| HLA             | 0.122                                  | 0.004              | 0.038                               | 0.030                    |
| IFITM2          | 0.107                                  | 0.002              | 0.026                               | 0.019                    |
| STAT1           | 0.354                                  | 0.002              | 0.026                               | 0.018                    |
| IFITM3          | 0.164                                  | 0.000              | 0.010                               | 0.004                    |



**Supplementary Table 3.** T-test for whether individual IMCIA gene expression level higher at week 8 versus control

| Signature genes | Difference, experimental minus control | Unadjusted p-value | Benjamini-Hochberg adjusted p-value | Li & Ji adjusted p-value |
|-----------------|----------------------------------------|--------------------|-------------------------------------|--------------------------|
| UNC93B1         | -0.030                                 | 0.877              | 0.877                               | 0.877                    |
| APOBEC3G        | 0.028                                  | 0.756              | 0.778                               | 0.778                    |
| CCL8            | 0.109                                  | 0.721              | 0.765                               | 0.764                    |
| IL15            | 0.158                                  | 0.585              | 0.639                               | 0.638                    |
| IRF9            | 0.043                                  | 0.368              | 0.415                               | 0.414                    |
| MYD88           | 0.057                                  | 0.335              | 0.391                               | 0.390                    |
| PLSCR1          | 0.262                                  | 0.282              | 0.340                               | 0.338                    |
| IFITM1          | 0.214                                  | 0.264              | 0.330                               | 0.328                    |
| B2M             | 0.043                                  | 0.232              | 0.301                               | 0.299                    |
| MICB            | 0.187                                  | 0.189              | 0.255                               | 0.253                    |
| FOSL1           | 0.226                                  | 0.163              | 0.228                               | 0.226                    |
| ZC3HAV1         | 0.069                                  | 0.160              | 0.228                               | 0.226                    |
| BCL3            | 0.251                                  | 0.141              | 0.215                               | 0.212                    |
| HLA             | 0.029                                  | 0.129              | 0.205                               | 0.203                    |
| EIF2AK2         | 0.444                                  | 0.118              | 0.196                               | 0.193                    |
| DDX58           | 0.123                                  | 0.086              | 0.150                               | 0.147                    |
| RSAD2           | 0.453                                  | 0.068              | 0.125                               | 0.123                    |
| IFIH1           | 0.653                                  | 0.054              | 0.105                               | 0.103                    |
| HERC5           | 0.158                                  | 0.043              | 0.087                               | 0.085                    |
| IFI35           | 0.084                                  | 0.038              | 0.083                               | 0.081                    |
| IFITM2          | 0.070                                  | 0.035              | 0.082                               | 0.079                    |
| ISG20           | 0.199                                  | 0.033              | 0.082                               | 0.079                    |
| STAT2           | 0.072                                  | 0.032              | 0.082                               | 0.079                    |
| BST2            | 0.208                                  | 0.023              | 0.066                               | 0.064                    |
| TRIM22          | 0.181                                  | 0.016              | 0.051                               | 0.049                    |
| CCL5            | 0.201                                  | 0.012              | 0.042                               | 0.040                    |
| IFI16           | 0.150                                  | 0.008              | 0.033                               | 0.031                    |
| ISG15           | 0.504                                  | 0.007              | 0.032                               | 0.030                    |
| CXCL10          | 0.963                                  | 0.006              | 0.032                               | 0.029                    |
| IFITM3          | 0.131                                  | 0.005              | 0.029                               | 0.027                    |
| MX2             | 0.700                                  | 0.004              | 0.025                               | 0.022                    |
| IRF7            | 0.284                                  | 0.003              | 0.025                               | 0.022                    |
| STAT1           | 0.234                                  | 0.003              | 0.025                               | 0.022                    |
| MX1             | 0.120                                  | 0.001              | 0.019                               | 0.014                    |
| IFI44           | 0.313                                  | 0.000              | 0.013                               | 0.008                    |
